# Supplementary material for: Highly selective fluorescent recognition of histidine by a crown ether–terpyridine–Zn(ii) sensor
Source: Royal Society of Chemistry journal article supplement (doi:10.1039/c3cc42081g), 2013-01-01

# *Supporting Information For*

## **Highly Selective Fluorescent Recognition of Histidine by a Crown Ether-Terpyridine-Zn(II) Sensor**

*Jiao Du,<sup>a</sup> Zeng Huang,<sup>a</sup> Xiao-Qi Yu<sup>\*a</sup> and Lin Pu<sup>\*a,b</sup>*

### **Contents**

|                                                                                                                                         |             |
|-----------------------------------------------------------------------------------------------------------------------------------------|-------------|
| <b>1. General data</b>                                                                                                                  | <b>S-2</b>  |
| <b>2. Preparation and Spectroscopic Characterization of New Compounds</b>                                                               | <b>S-2</b>  |
| <b>3. Fluorescence Experiments and Spectra</b>                                                                                          | <b>S-8</b>  |
| <b>4. Study of Compound 9</b>                                                                                                           | <b>S-13</b> |
| <b>5. Job Plots</b>                                                                                                                     | <b>S-15</b> |
| <b>6. <sup>1</sup>H-NMR Spectrum of the Isolated Precipitate</b>                                                                        | <b>S-17</b> |
| <b>7. UV Absorption Spectra</b>                                                                                                         | <b>S-18</b> |
| <b>8. Fluorescence Recovery of 8+Zn<sup>2+</sup>(2.5 equiv) Complex in the Presence of the Mixtures of Histidine with Other Species</b> | <b>S-19</b> |
| <b>9. Mass Analyses for the 8+Zn<sup>2+</sup> Complex and Its Interaction with Histidine</b>                                            | <b>S-20</b> |

## 1. General data

$^1\text{H}$  and  $^{13}\text{C}$  NMR spectra were measured on a Bruker AM400 NMR spectrometer. Proton chemical shifts of NMR spectra were given in ppm relative to internal reference TMS (1H, 0.00 ppm). ESI-MS and HRMS spectral data were recorded on a Finnigan LCQ<sup>DECA</sup> and a Bruker Daltonics Bio TOF mass spectrometer, respectively. Fluorescence emission spectra were obtained using FluoroMax-4 Spectrofluorophotometer (HORIBA Jobin Yvon) at 298 K. Unless otherwise noted, materials were obtained from commercial suppliers and were used without further purification. All the solvents were dried according to the standard methods prior to use. All of the solvents were either HPLC or spectroscopic grade in the optical spectroscopic studies.

## 2. Preparation and Spectroscopic Characterization of New Compounds

**Preparation and characterization of 4'-(12,13,15,16,18,19,21,22-octahydrodinaphtho[2,1-n:1',2'-p][1,4,7,10,13]pentaoxacycloheptadecin-10-yl)-2,2':6',2''-terpyridine 8.** 3-([2,2':6',2''-terpyridin]-4'-yl)-[1,1'-binaphthalene]-2,2'-diol **7** (0.98 g, 1.89 mmol) was stirred with dry  $\text{K}_2\text{CO}_3$  (0.68 g, 4.92 mmol) in DMF at 90 °C. After 1 h, ((oxybis(ethane-2,1-diyl))bis(oxy))bis(ethane-2,1-diyl)bis(4-methylbenzenesulfonate) (1.14 g, 2.27 mmol) was added to the reaction mixture. The solution was heated at 90 °C for 24 h. Then water (30 mL) and dichloromethane (50 mL) were added. The organic layer was separated and the water layer was extracted by dichloromethane (50 mL  $\times$  3). The organic layers were combined and washed with saturated NaCl (30 mL  $\times$  3). After dried over  $\text{Na}_2\text{SO}_4$ , the solvent was removed and the residue was subjected to column chromatography on silica gel eluted with petroleum ether/ethyl acetate (2:1) to afford the product **8** as a white solid in 46% yield (0.57 g).  $^1\text{H}$  NMR ( $\text{CDCl}_3$ , 400 MHz)  $\delta$  8.85 (s, 2H), 8.79- 8.67 (m, 4H), 8.17 (s, 1H), 7.98 (d, 1H,  $J = 9.2$  Hz), 7.94 (d, 1H,  $J = 8.00$  Hz), 7.88- 8.84 (m, 3H), 7.54 (d, 1H,  $J = 9.2$  Hz), 7.41 (t, 1H,  $J = 16.0$  Hz), 7.35- 7.17 (m, 7H),

4.47- 4.42 (m, 1H), 4.15- 4.10 (m, 1H), 3.78- 3.72 (m, 1H), 3.70- 3.65 (m, 1H), 3.60- 3.48 (m, 5H), 3.43- 3.36 (m, 2H), 3.24- 3.19 (m, 1H), 3.14- 3.03(m, 3H), 2.89- 2.83 (m, 1H).  $^{13}\text{C}$  NMR ( $\text{CDCl}_3$ , 100 MHz)  $\delta$  156.4, 155.3, 154.4, 153.2, 149.3, 149.2, 136.9, 134.3, 134.1, 133.5, 130.6, 130.2, 129.7, 129.1, 128.3, 128.0, 126.8, 126.7, 125.7, 125.5, 123.7, 123.7, 122.1, 121.4, 119.6, 114.8. HR-MS (ES<sup>+</sup>) calcd for  $\text{C}_{43}\text{H}_{37}\text{N}_3\text{O}_5$  (M+Na) 698.2625 and (M+H) 676.2806, found 698.2653 and 676.2802.

$^1\text{H}$ -NMR of 8 (400MHz in  $\text{CDCl}_3$ )

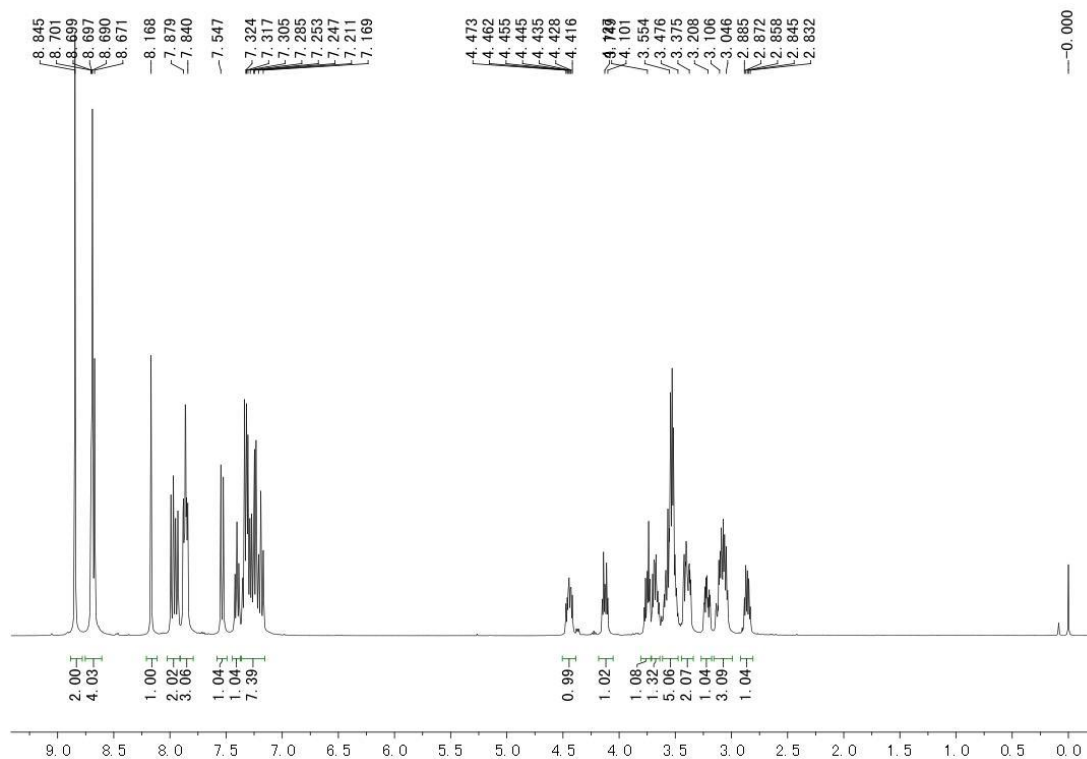

### $^{13}\text{C-NMR}$ of **8** (100 MHz in $\text{CDCl}_3$ )

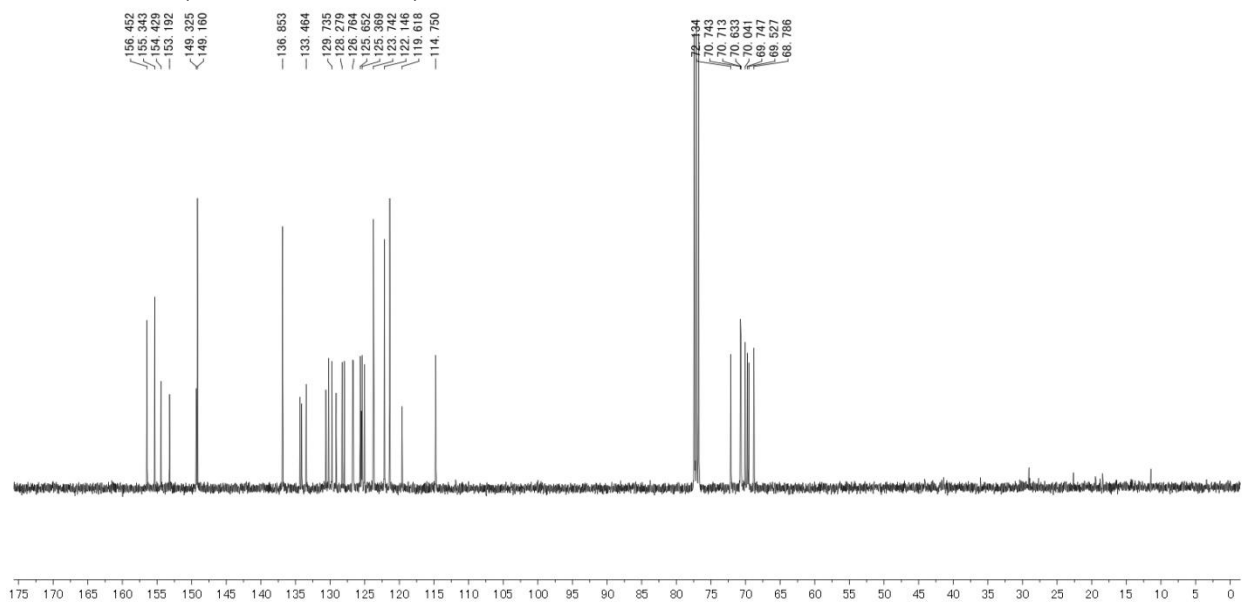

### HRMS (TOF MS ES+) of **8**

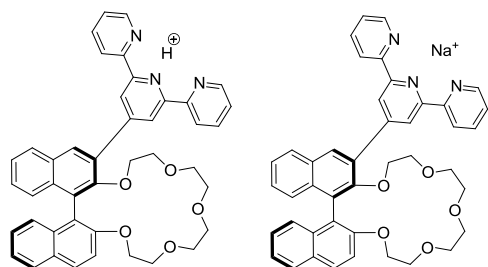

Chemical Formula:  $\text{C}_{43}\text{H}_{38}\text{N}_3\text{O}_5^+$     Chemical Formula:  $\text{C}_{43}\text{H}_{37}\text{N}_3\text{NaO}_5^+$   
Exact Mass: 676.2806                      Exact Mass: 698.2625

18:06:45

120428\_R\_5\_1\_8 (0.137) AM (Cen.4, 80.00, Ar,10000.0,0.00,0.70); Sm (SG, 2x3.00); Cm (3.36)

28-Apr-2012

TOF MS ES+

176

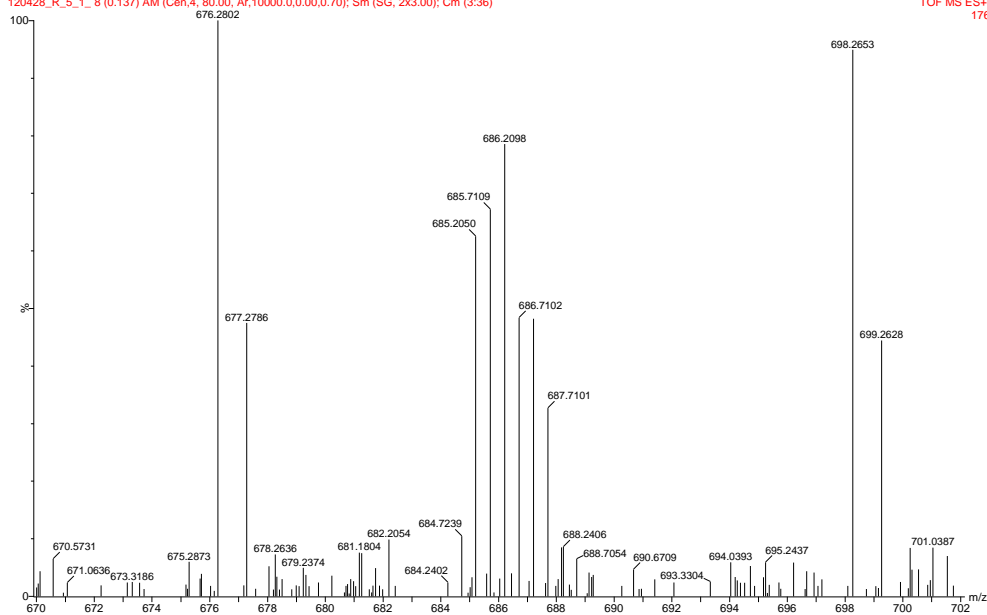

**Preparation and characterization of 4'-(2,2'-bis(2-(2-(2-methoxyethoxy)ethoxy)ethoxy)-[1,1'-binaphthalen]-3-yl)-2,2':6',2''-terpyridine 9.**

3-([2,2':6',2''-terpyridin]-4'-yl)-[1,1'-binaphthalene]-2,2'-diol **7** (0.50 g, 0.97 mmol) was stirred with dry  $K_2CO_3$  (0.35 g, 2.53 mmol) in DMF at 90 °C. After 1 h, ((oxybis (ethane-2,1-diyl))bis(oxy))bis(ethane-2,1-diyl)bis(4-methylbenzenesulfonate) (0.92 g, 2.89 mmol) was added to the reaction mixture. The solution was heated at 90 °C for 24 h. Then water (30 mL) and dichloromethane (50 mL) were added. The organic layer was separated and the water layer was extracted by dichloromethane (50 mL × 3). The organic layers were combined and washed with saturated NaCl (20 mL × 3). After dried over  $Na_2SO_4$ , the solvent was removed and the residue was subjected to column chromatography on basic  $Al_2O_3$  gel eluted with petroleum ether/ethyl acetate (1:1) to afford the product **9** as a light yellow oily solid in 54.7% yield (0.43 g).  $^1H$  NMR (400 MHz,  $CDCl_3$ )  $\delta$  8.79 (s, 2H), 8.64- 8.60 (m, 4H), 8.17 (s, 1H), 7.88 (t, 2H,  $J = 10.4$  Hz), 7.79 (t, 3H,  $J = 8.4$  Hz), 7.39- 7.32 (m, 2H), 7.28- 7.24 (m, 3H), 7.21- 7.17 (m, 3H), 7.11 (d, 1H,  $J = 8.4$  Hz), 4.18- 4.07 (m, 2H), 3.51 (t, 2H,  $J = 4.8$  Hz), 3.47- 3.43 (m, 1H), 3.85- 3.33 (m, 5H), 3.27- 3.10 (m, 14H), 2.96- 2.76 (m, 6H).  $^{13}C$  NMR (100 MHz,  $CDCl_3$ )  $\delta$  156.3, 155.5, 154.4, 153.0, 149.2, 148.9, 136.9, 134.3, 134.1, 133.0, 130.7, 130.4, 129.8, 129.3, 128.3, 127.9, 126.7, 126.7, 126.2, 125.8, 125.5, 125.2, 123.8, 123.8, 121.8, 121.3, 119.9, 115.0, 72.6, 71.8, 71.8, 70.6, 70.4, 70.3, 70.1, 70.1, 69.7, 69.6, 69.6, 69.5, 58.9, 58.9. HR-MS (ES+) calcd for  $C_{49}H_{52}N_3O_8$  (M+H) 810.3746, found 810.3759.

### <sup>1</sup>H-NMR of 9 (400 MHz in CDCl<sub>3</sub>)

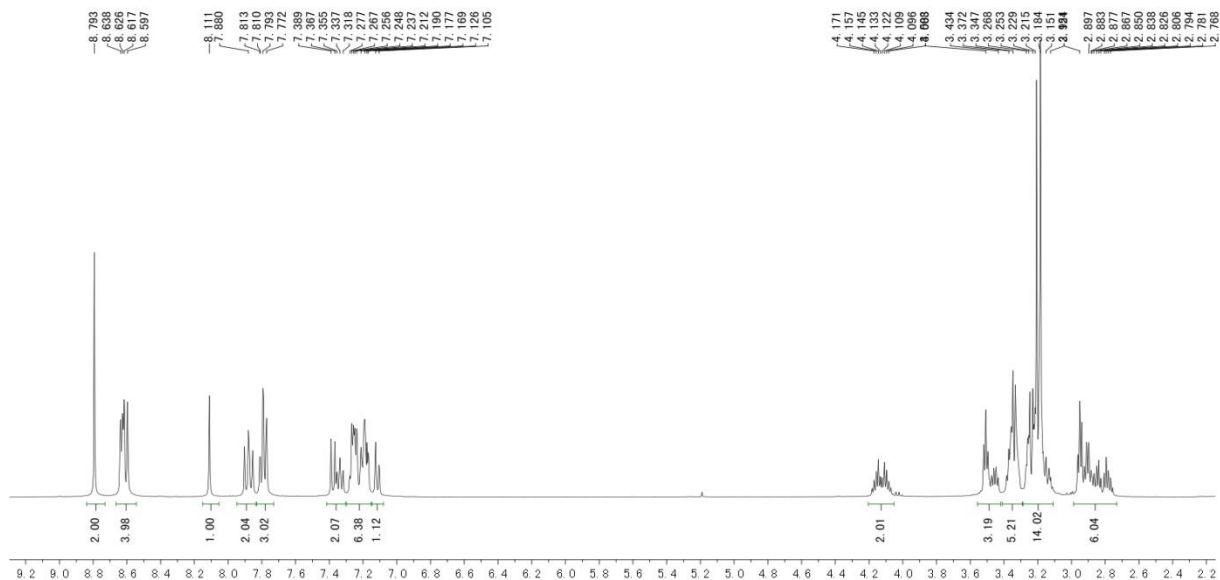

### <sup>13</sup>C-NMR of 9 (100 MHz in CDCl<sub>3</sub>)

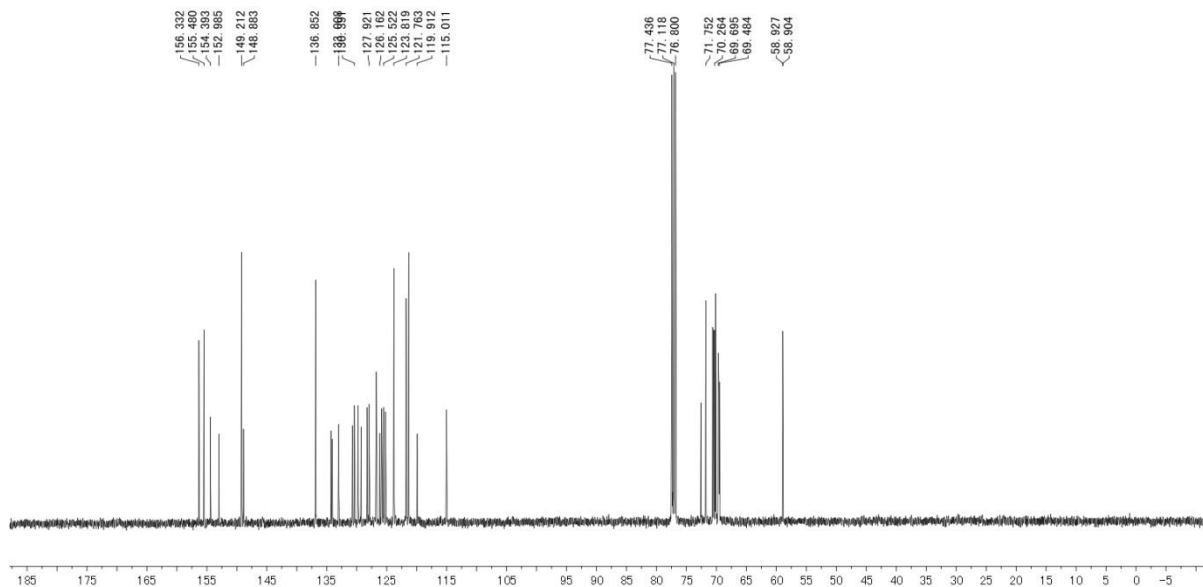

### HRMS (TOF MS ES+) of 9

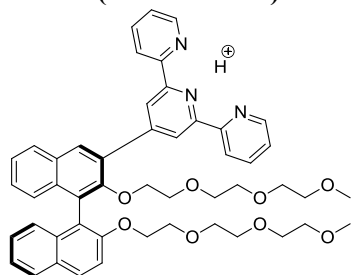

Chemical Formula: C<sub>49</sub>H<sub>52</sub>N<sub>3</sub>O<sub>8</sub><sup>+</sup>  
Exact Mass: 810.3749

16:57:01

120929\_R\_5\_TEG 3 (0.051) AM (Cen.4, 80.00, Ar,10000.0,0.00,0.70); Sm (SG, 2x3.00); Cm (1:36)

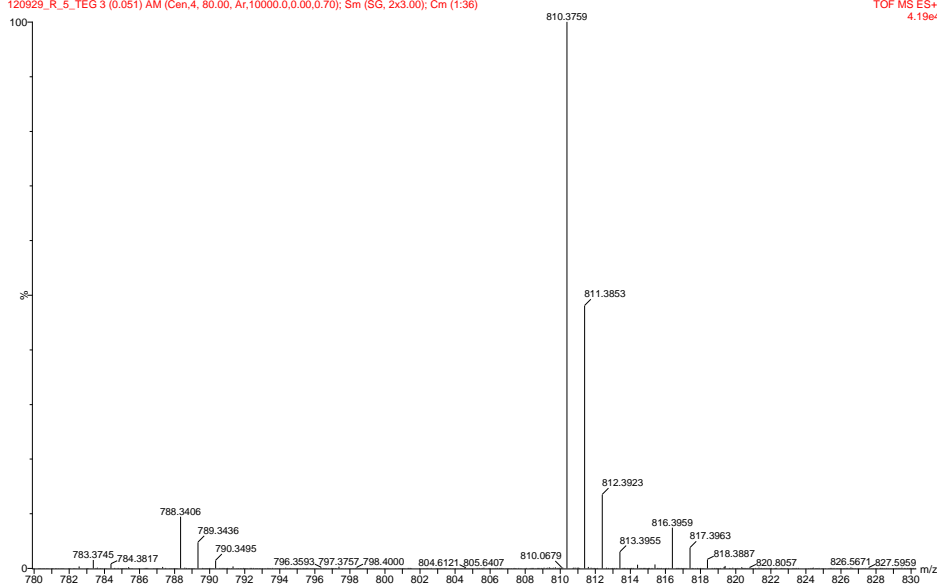

29-Sep-2012  
TOF MS ES+  
4.19e4

### 3. Fluorescence Experiments and Spectra

**Figure S1.** Fluorescence Responses of Tpy+Zn<sup>2+</sup>(0.6 equiv) ( $2.0 \times 10^{-5}$  M in H<sub>2</sub>O with 1% THF) at  $\lambda_{\text{emi}} = 353$  nm in the Presence of 10 equiv Amino Acids ( $\lambda_{\text{exc}} = 298$  nm, slits: 2 nm/ 2 nm).

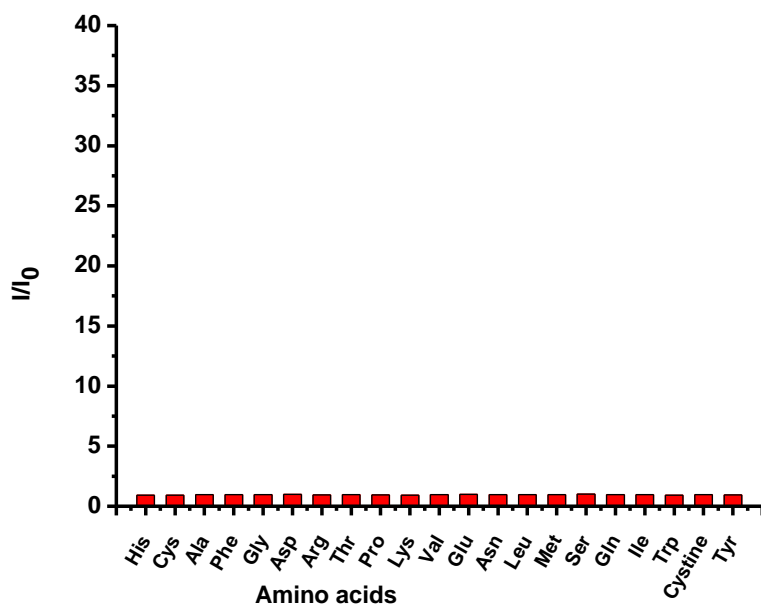

**Figure S2.** Fluorescence Titration of **7** ( $2.0 \times 10^{-5}$  M in THF: H<sub>2</sub>O = 1:1) with Zn(NO<sub>3</sub>)<sub>2</sub>·6H<sub>2</sub>O ( $\lambda_{\text{exc}} = 321$  nm, slits: 5nm/5nm).

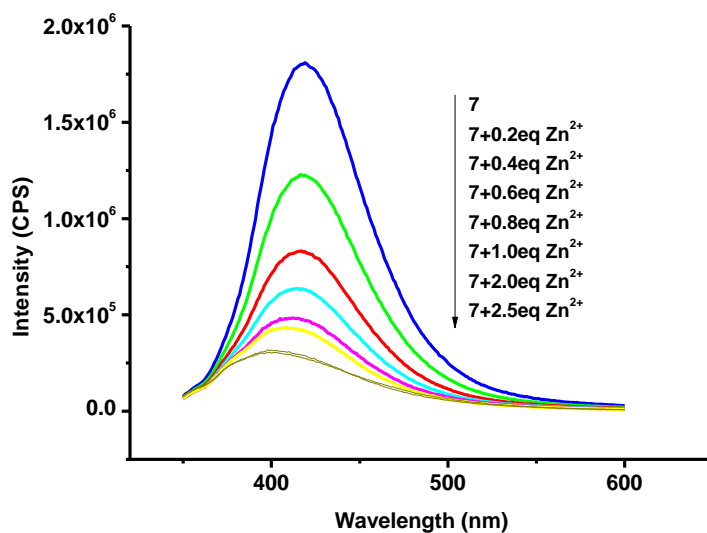



**Figure S3.** Fluorescence Titration of **8** ( $2.0 \times 10^{-5} \text{M}$  in THF:  $\text{H}_2\text{O} = 1:1$ ) with  $\text{Zn}(\text{NO}_3)_2 \cdot 6\text{H}_2\text{O}$  ( $\lambda_{\text{exc}} = 300 \text{ nm}$ , slits:  $5 \text{ nm}/5 \text{ nm}$ ).

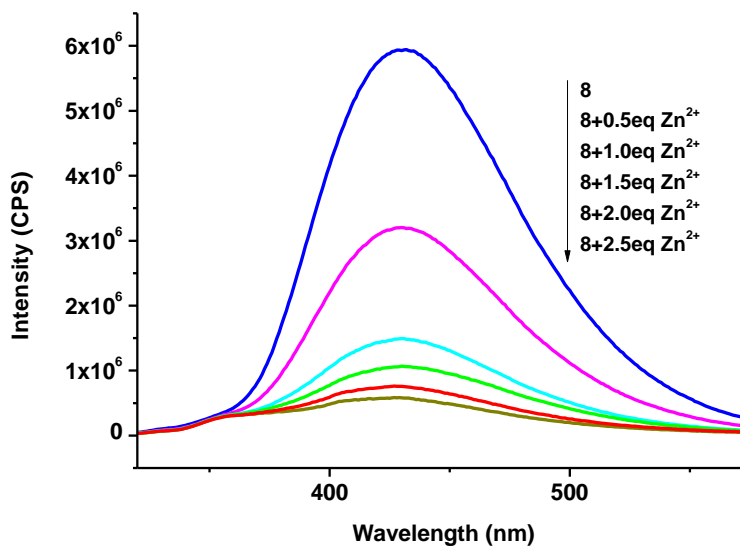

**Figure S4.** Fluorescence enhancement of **7** +  $2.5 \text{ eq Zn}^{2+}$  ( $2.0 \times 10^{-5} \text{ M}$  in THF: HEPES =  $1:9$ ) at  $439 \text{ nm}$  when treated with 10 eq amino acids. ( $\lambda_{\text{exc}} = 321 \text{ nm}$ , slits:  $5 \text{ nm}/5 \text{ nm}$ ).

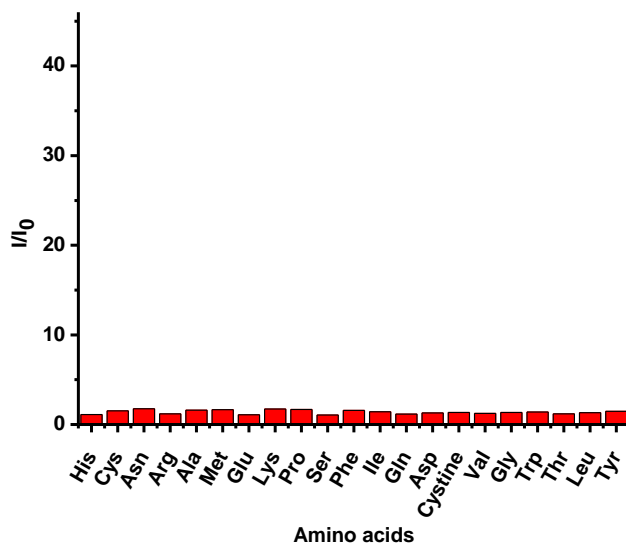

**Figure S5.** Fluorescence spectra of  $\mathbf{8}+\text{Zn}^{2+}$  (2.5 equiv) ( $2.0 \times 10^{-5}$  M in 25 mM pH = 7.35 hepes buffer with 1% THF) with histidine (10 equiv) and other amino acids (10 equiv) ( $\lambda_{\text{exc}} = 343$  nm, slits: 5 nm/ 5 nm).

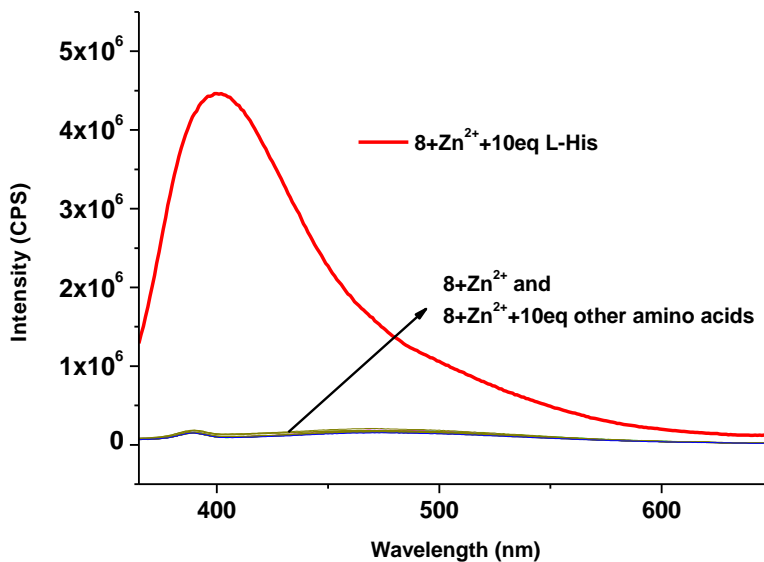

**Figure S6.** Photos of  $\mathbf{8}+\text{Zn}^{2+}$  (2.5 equiv) ( $1 \times 10^{-4}$  M in  $\text{H}_2\text{O}$  with 1% THF ) with (left) and without (right) histidine (10 equiv).

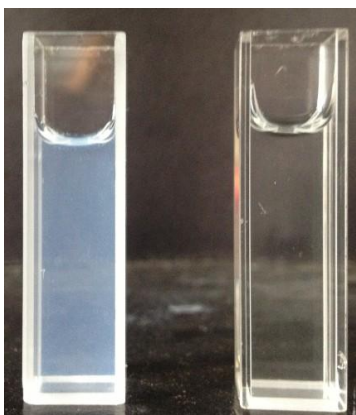

**Figure S7.** Fluorescence Spectra of **8**+Zn<sup>2+</sup> (2.5 equiv) (1 × 10<sup>-4</sup> M H<sub>2</sub>O with 1% THF) with histidine (10 equiv) before and after centrifugation ( $\lambda_{\text{exc}} = 343$  nm, slits: 5 nm/ 5 nm).

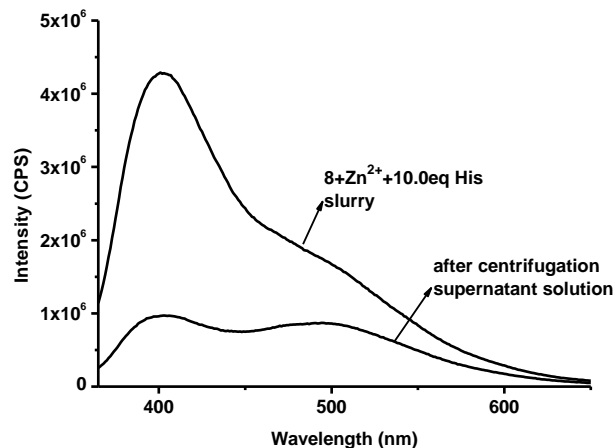

**Figure S8.** Fluorescence response of **8**+Zn<sup>2+</sup> (2.5 equiv) (2.0 × 10<sup>-5</sup> M in 25 mM pH = 7.35 hepes buffer with 1% THF) toward histidine and the derivatives of histidine and imidazole at  $\lambda_{\text{emi}} = 400$  nm ( $\lambda_{\text{exc}} = 343$  nm, slits: 5 nm/ 5 nm).

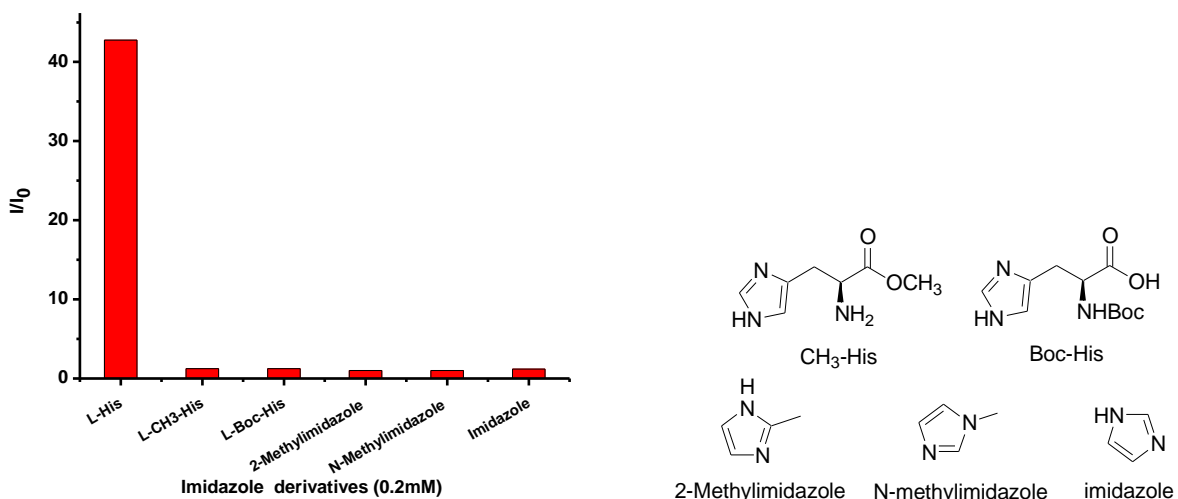

**Figure S9.** Fluorescence enhancement of (*R*)-**8**+Zn<sup>2+</sup>(2.5 equiv) ( $2.0 \times 10^{-5}$  M in 25mM pH=7.35 hepes buffer with 1% THF) at  $\lambda_{\text{emi}} = 400$  nm when treated with L- and D- histidine. ( $\lambda_{\text{exc}} = 343$  nm, slits: 5 nm/ 5 nm).

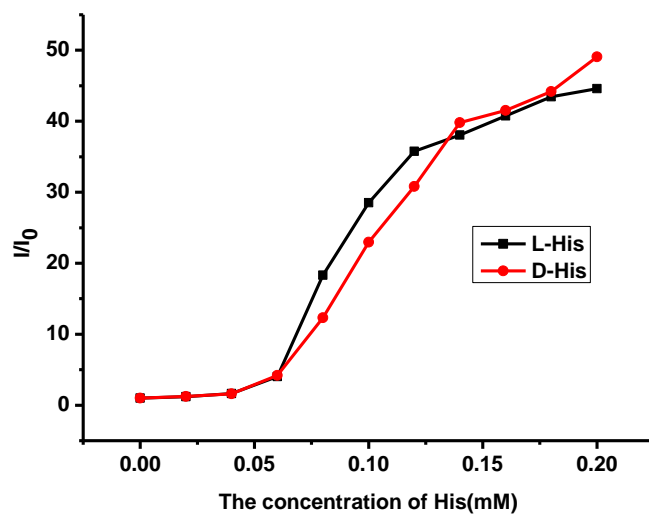

#### 4. Study of Compound 9

We have prepared compound **9** as an acyclic polyether analogue of **8** without the crown ether ring. Similar to **7** and **8**, when **9** was treated with  $Zn^{2+}$ , its fluorescence was significantly quenched upon coordination of  $Zn^{2+}$  with the Tpy unit (Fig. S10). However, when the  $9+Zn^{2+}$  (2.5 equiv) complex was treated with histidine as well as other amino acids, almost no fluorescence enhancement was observed (Fig. S11) and there was also no precipitate formation in these interactions. These results demonstrate that the crown ether ring of **8** is very important for the highly selective fluorescent recognition of histidine in the presence of  $Zn^{2+}$ . Coordination of the crown ether ring with  $Zn^{2+}$  and its subsequent interaction with histidine is very likely. (For the coordination of 15-crown-5 with  $Zn^{2+}$ , see: Cooper, T. E.; Carl, D. R.; Oomens, J.; Steill, J. D.; Armentrout, P. B.. *J. Phys. Chem. A*, **2011**, *115*, 5408–5422.)

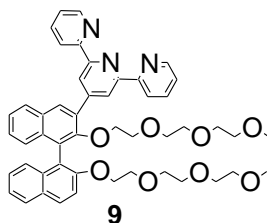

**Figure S10.** Fluorescence titration of **9** ( $2.0 \times 10^{-5} \text{M}$  in THF:  $\text{H}_2\text{O}=1:1$ ) with  $\text{Zn}(\text{NO}_3)_2 \cdot 6\text{H}_2\text{O}$  ( $\lambda_{\text{exc}}=322\text{nm}$ , slits:  $5\text{nm}/5\text{nm}$ ).

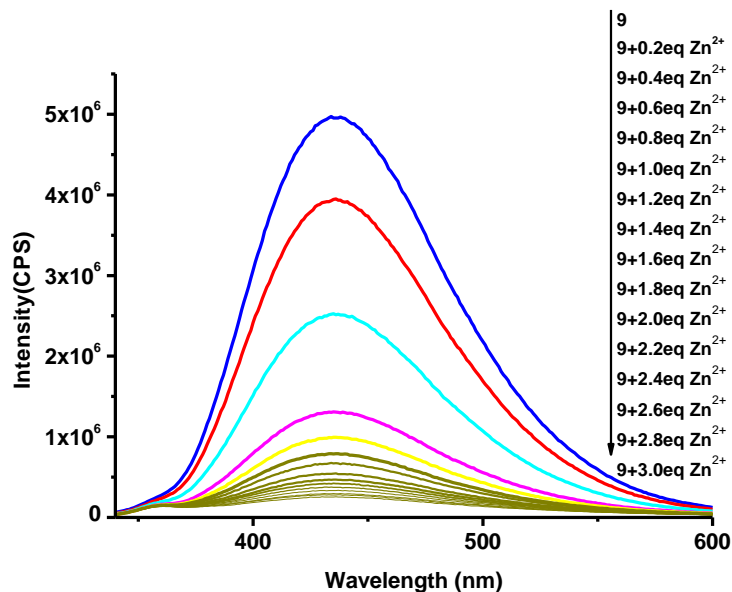

**Figure S11.** Fluorescence response of **9**+ $\text{Zn}^{2+}$  (2.5 equiv) ( $2.0 \times 10^{-5} \text{M}$  in 20mM pH=7.4 hepes buffer with 0.02% THF) at  $\lambda_{\text{emi}} = 414 \text{ nm}$  when treated with Amino Acids (10 equiv) ( $\lambda_{\text{exc}} = 322 \text{ nm}$ , slits:  $5 \text{ nm}/ 5 \text{ nm}$ ).

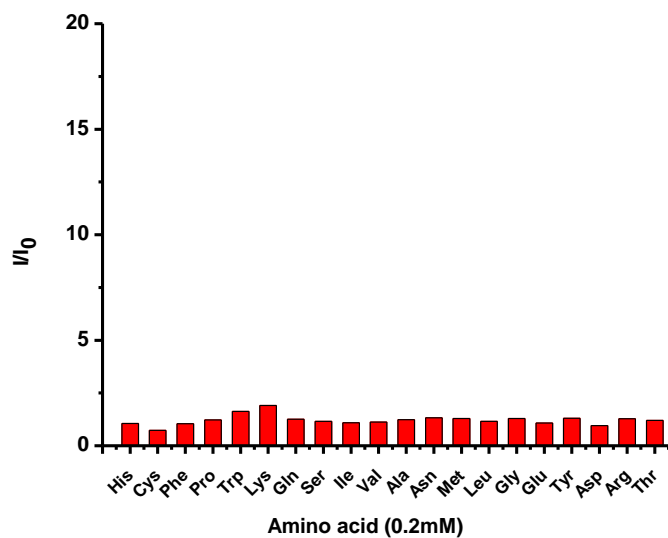

## 5. Job Plots

The Job plot for the interaction of **8** with  $\text{Zn}^{2+}$  was obtained by measuring the fluorescence response of **8** with varying ratio of  $\text{Zn}^{2+}$  versus **8** while the total concentration of  $\mathbf{8}+\text{Zn}^{2+}$  was maintained. As Figure S12 shows, the major fluorescence quenching of **8** by  $\text{Zn}^{2+}$  occurs at 1:1 ratio. On the basis of the fluorescence responses of compounds **7**, **8** and **9** to  $\text{Zn}^{2+}$ , we propose that when **8** was treated with  $\text{Zn}^{2+}$ , the binding of its Tpy unit with  $\text{Zn}^{2+}$  led to the major fluorescence quenching. Previously, we observed that Tpy forms strong complex with  $\text{Zn}^{2+}$  in water with an association constant of  $3.35 \times 10^7$  (Huang, Z.; Du J.; Zhang, J.; Yu, X. Q.; Pu, L. *Anal. Methods*, **2012**, *4*, 1909-1912). Figure S12 also indicates that there are additional bindings between **8** and  $\text{Zn}^{2+}$  which led to smaller fluorescence quenching. This could be attributed to the interaction of the crown ether ring of **8** with  $\text{Zn}^{2+}$ . We then obtained the Job plot for the interaction of the complex  $\mathbf{8}+\text{Zn}^{2+}$  (2.5 equiv) with varying ratio of histidine by measuring the fluorescence response while the total concentration was maintained (Figure S12'). It shows that the fluorescence enhancement of complex  $\mathbf{8}+\text{Zn}^{2+}$  started at the complex versus histidine ratio greater than 1:1 and peaked at 1:4. Because of the precipitate formation, the accurate association constant could not be obtained.

**Figure S12.** The Fluorescence Intensity of **8** at 439 nm with varying ratio of  $\text{Zn}^{2+}$  (The total concentration of  $\mathbf{8} + [\text{Zn}^{2+}] = 2 \times 10^{-5} \text{ M}$  in  $\text{THF}:\text{H}_2\text{O} = 1:4$ )

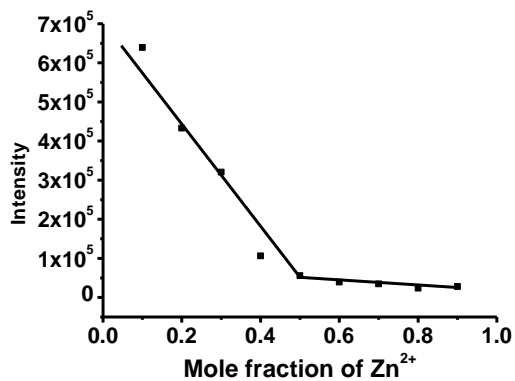

**Figure S12'.** Fluorescence intensity of  $\mathbf{8} + \text{Zn}^{2+}$  (2.5 equiv) complex at 400 nm in the presence of varying amount of histidine (The total concentration of  $[\mathbf{8} + \text{Zn}^{2+}] + [\text{His}] = 1 \times 10^{-4} \text{ M}$  in 25mM pH=7.35 hepes buffer solution at  $37^\circ\text{C}$ ).

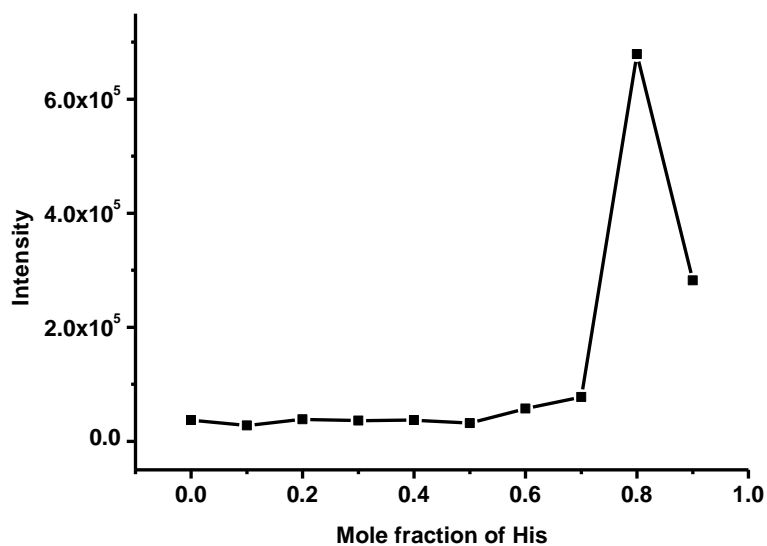



## 6. $^1\text{H-NMR}$ Spectrum of the Isolated Precipitate

**Figure S13.**  $^1\text{H-NMR}$  spectrum of the precipitate isolated from the reaction of **8**+ $\text{Zn}^{2+}$  (2.5 equiv) with histidine in  $\text{H}_2\text{O}$  solution (400 MHz in  $\text{DMSO-}d_6$ )

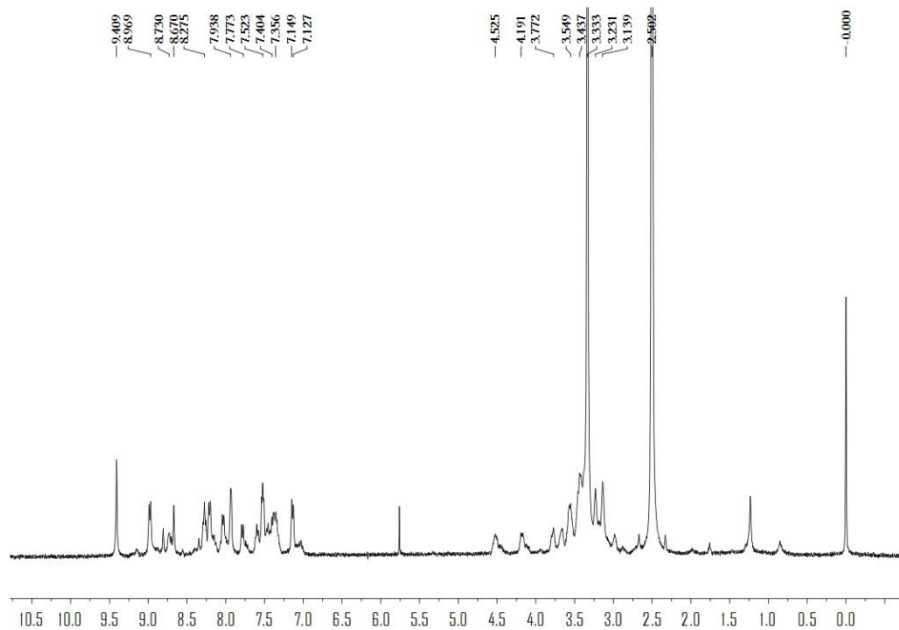

## 7. UV Absorption Spectra

**Figure S14.** (a) Absorption spectra of **8** ( $4.0 \times 10^{-6}$  M in water with 0.2% THF) when treated with  $\text{Zn}^{2+}$  (from 0.2 to 4.0 equiv). (b) Absorption spectra of **8**+ $\text{Zn}^{2+}$ (2.5 equiv) ( $4.0 \times 10^{-6}$  M in water with 0.2% THF) when treated with 1.0, 2.0, 3.0, 4.0, 5.0, 6.0, 7.0, 8.0, 9.0 and 10.0 equiv histidine. (The solution remained homogenous because of the low concentration of **8**)

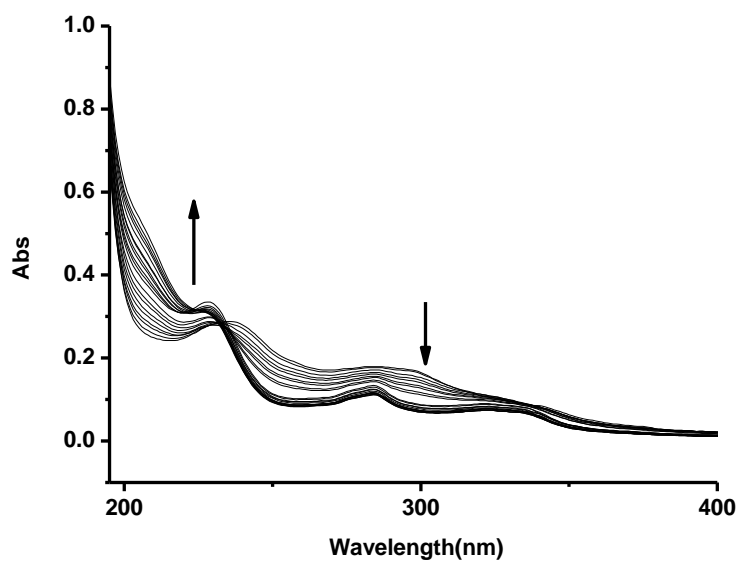

(a)

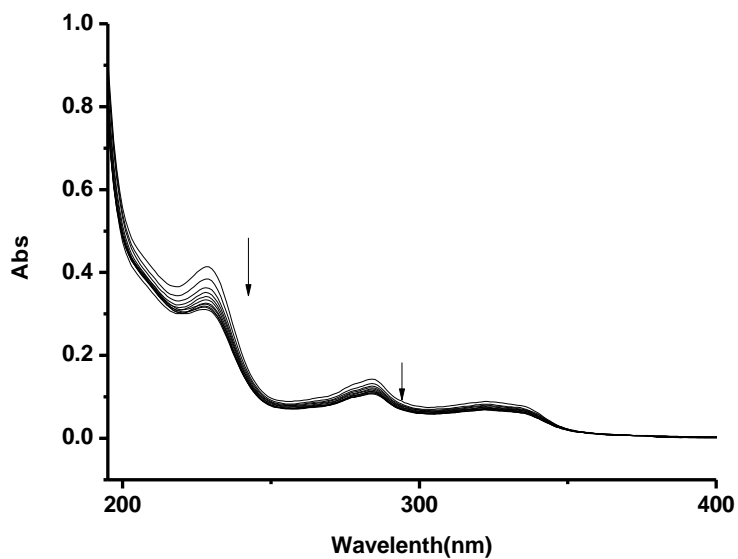

(b)

## 8. Fluorescence Recovery of $\mathbf{8}+\text{Zn}^{2+}$ (2.5 equiv) Complex in the Presence of the Mixtures of Histidine with Other Species

We tested the fluorescence recovery of the  $\mathbf{8}+\text{Zn}^{2+}$  (2.5 equiv) complex in the presence of the mixtures of histidine with other species including natural amino acids and more. As summarized in Table S1, all the other natural amino acids had little effect on the fluorescent recognition of histidine by the  $\text{Zn}^{2+}$  complex. Alkaline metal and alkaline earth metal salts also did not interfere with the histidine recognition. Among the compounds examined,  $\text{FeCl}_3$  at concentration greater than 20  $\mu\text{M}$  was found to interfere with the measurement probably due to the competitive binding of the Tpy unit of  $\mathbf{8}$  with  $\text{Fe}^{3+}$ .

**Table S1.** Fluorescence Response of  $\mathbf{8}+\text{Zn}^{2+}$  (2.5 equiv) ( $2 \times 10^{-5}$  M) to the Mixtures of Histidine (200  $\mu\text{M}$ ) with Other Substances (All solutions were prepared in 25 mM hepes buffer at pH = 7.35.  $\lambda_{\text{exc}}=343\text{nm}$ , slits: 5nm/5nm)

| Added species | Conc. ( $\mu\text{M}$ ) | Recovery (%) | Added species              | Conc. ( $\mu\text{M}$ ) | Recovery (%) |
|---------------|-------------------------|--------------|----------------------------|-------------------------|--------------|
| L-Ala         | 200                     | 99.7         | L-Thr                      | 200                     | 104.5        |
| L-Glu         | 200                     | 99.8         | L-Asp                      | 200                     | 98.4         |
| L-Phe         | 200                     | 99.4         | L-Cys                      | 200                     | 93.6         |
| L-Lys         | 200                     | 99.2         | L-Cystine                  | 200                     | 95.6         |
| L-Trp         | 200                     | 95.7         | NaCl                       | 6000                    | 94.9         |
| L-Ser         | 200                     | 95.0         | $\text{Ca}(\text{NO}_3)_2$ | 4000                    | 96.0         |
| L-Arg         | 200                     | 94.5         | $\text{MgCl}_2$            | 8000                    | 96.2         |
| Gly           | 200                     | 97.5         | $\text{KNO}_3$             | 8000                    | 95.1         |
| L-Val         | 200                     | 93.8         | $\text{NaHCO}_3$           | 4000                    | 96.1         |
| L-Met         | 200                     | 97.0         | $\text{Na}_2\text{SO}_4$   | 800                     | 96.5         |
| L-Pro         | 200                     | 92.5         | $\text{Na}_3\text{PO}_4$   | 1000                    | 100.3        |
| L-Tyr         | 200                     | 95.6         | $\text{FeCl}_3$            | 20                      | 89.6         |
| L-Ile         | 200                     | 99.4         | Ascorbic acid              | 600                     | 95.6         |
| L-Gln         | 200                     | 99.9         | Glucose                    | 800                     | 99.8         |
| L-Leu         | 200                     | 99.2         | Acetylcholine chloride     | 400                     | 95.6         |
| L-Asn         | 200                     | 94.8         | L-Phenylalaninol           | 800                     | 95.1         |

## 9. Mass Analyses for the $8+Zn^{2+}$ Complex and Its Interaction with Histidine

MS spectra (TOF MS ES+) of **8** with the addition of  $Zn(NO_3)_2$  (2.5 equiv) and Histidine in water with 1% THF

Possible structures listed below:

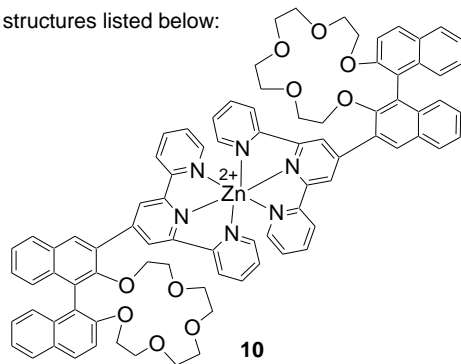

$C_{86}H_{74}N_6O_{10}Zn$   
Exact Mass ( $^{64}Zn$  natural abundance 48.6%): 1414.48  
 $1416.48/2 = 707.24$   
Exact Mass ( $^{66}Zn$  natural abundance 27.9%): 1416.48  
 $1416.48/2 = 708.24$

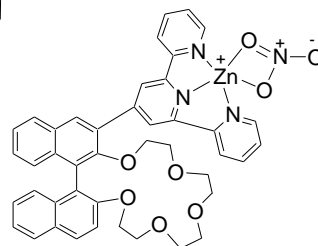

$C_{43}H_{37}N_4O_8Zn$   
Exact mass = 801.19

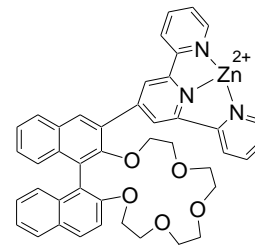

$C_{43}H_{37}N_3O_5Zn$   
Exact mass: 739.20  
 $739.20/2 = 369.60$

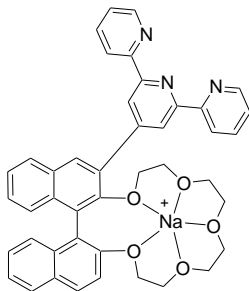

$C_{43}H_{37}N_3NaO_5$   
Exact Mass: 698.2625

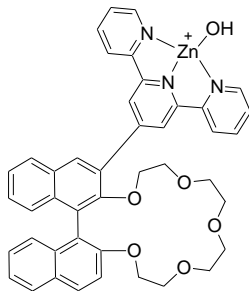

$C_{43}H_{38}N_3O_6Zn$   
Exact Mass: 756.21

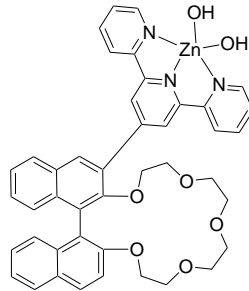

$C_{43}H_{40}N_3O_7Zn$   
Exact Mass of  $M+H^+$ : 774.22

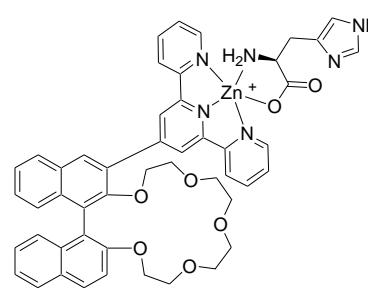

$C_{49}H_{45}N_6O_7Zn$   
Exact Mass: 893.26

**8+Zn<sup>2+</sup>**

10:18:39

120905\_R\_5\_CROWN\_ZN2 19 (0.325) AM (Cen,4, 80.00, Ar,10000.0,0.00,0.70); Sm (SG, 2x3.00); Cm (1:59)

05-Sep-2012

TOF MS ES+  
2.92e4

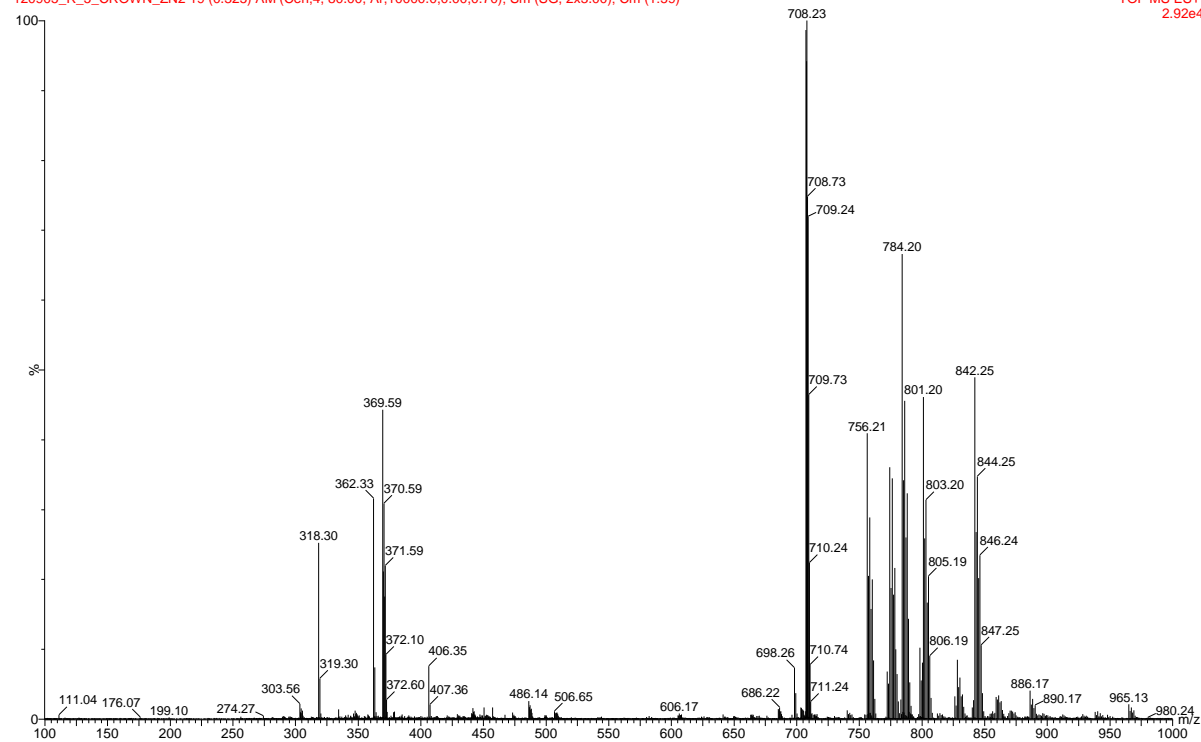

10:18:39

120905\_R\_5\_CROWN\_ZN2 19 (0.325) AM (Cen,4, 80.00, Ar,10000.0,0.00,0.70); Sm (SG, 2x3.00); Cm (1:59)

05-Sep-2012

TOF MS ES+  
2.92e4

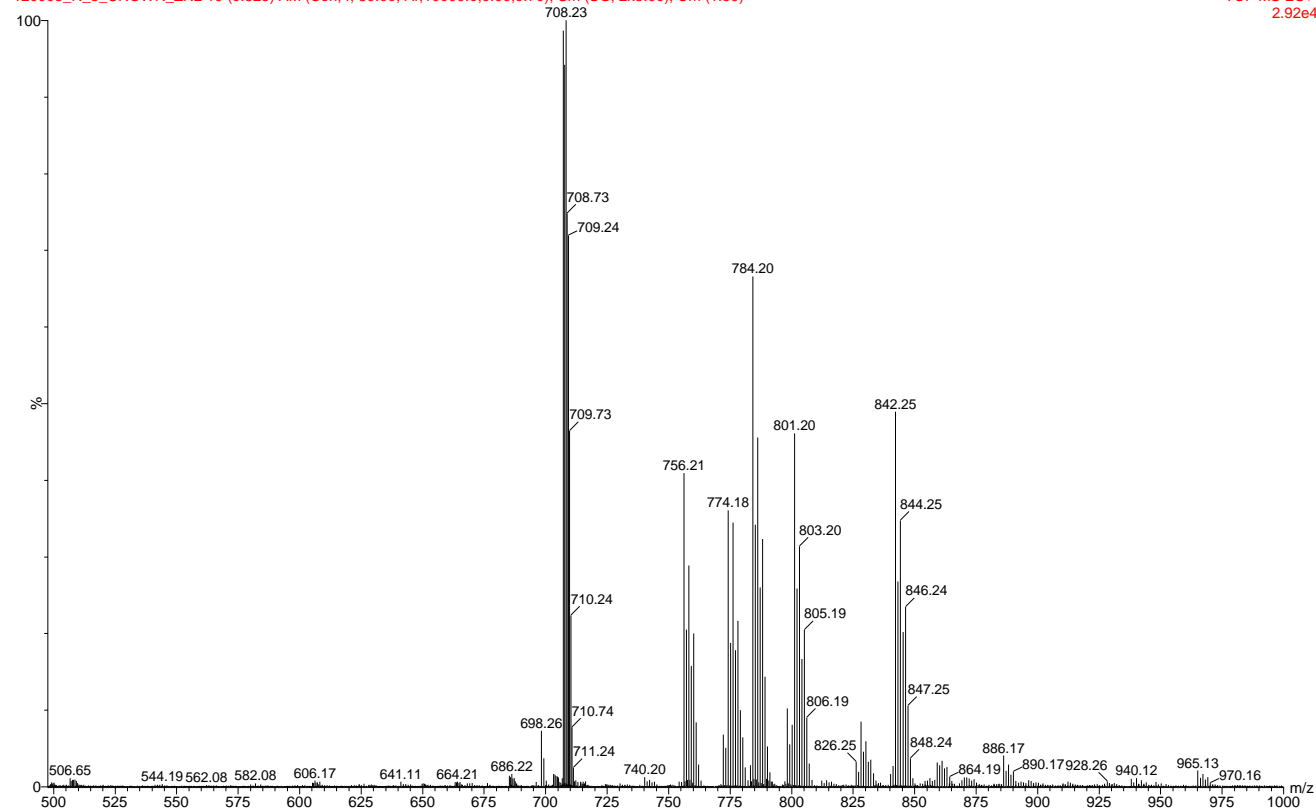

a peak is also observed at 707.23.

### 8+Zn<sup>2+</sup>+1.0eq His

10:07:29

120905\_HIS\_10EG 54 (0.923) AM (Cen,4, 80.00, Ar,10000.0,0.00,0.70); Sm (SG, 2x3.00); Cm (1:59)

05-Sep-2012

TOF MS ES+  
1.75e4

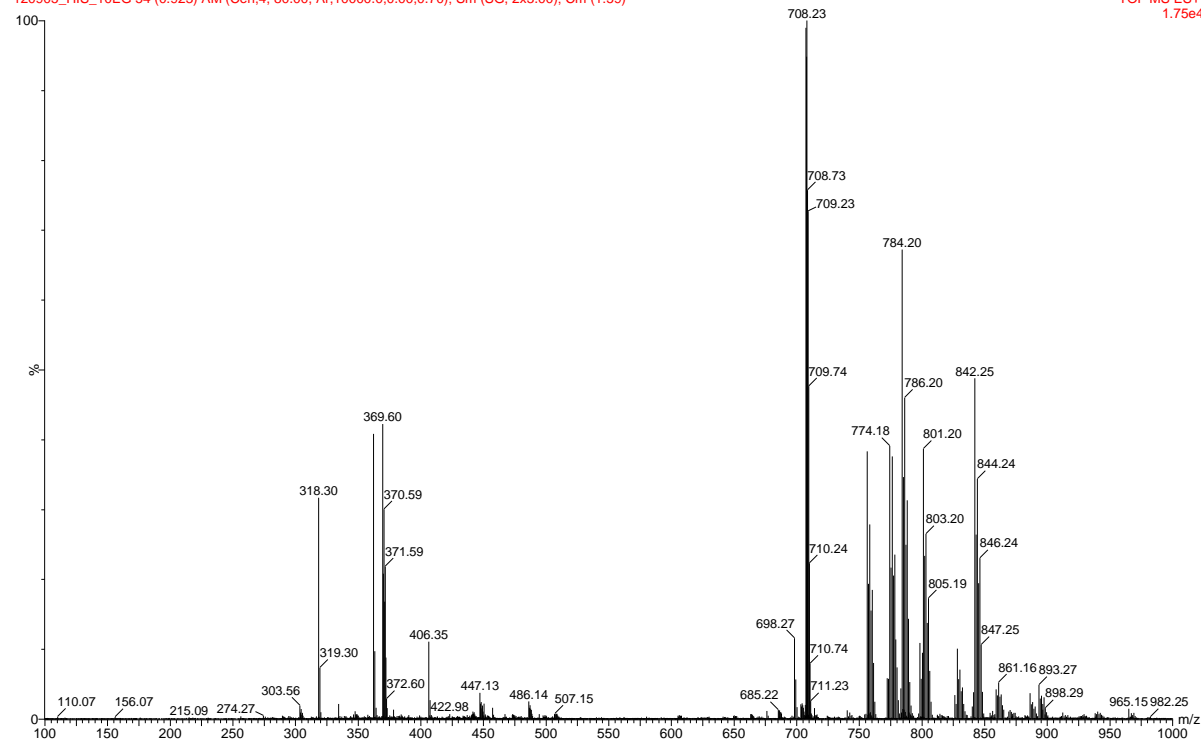

### 8+Zn<sup>2+</sup>+3.0eq His

10:01:28

120905\_HIS\_30EG 35 (0.599) AM (Cen,4, 80.00, Ar,10000.0,0.00,0.70); Sm (SG, 2x3.00); Cm (1:59)

05-Sep-2012

TOF MS ES+  
1.30e4

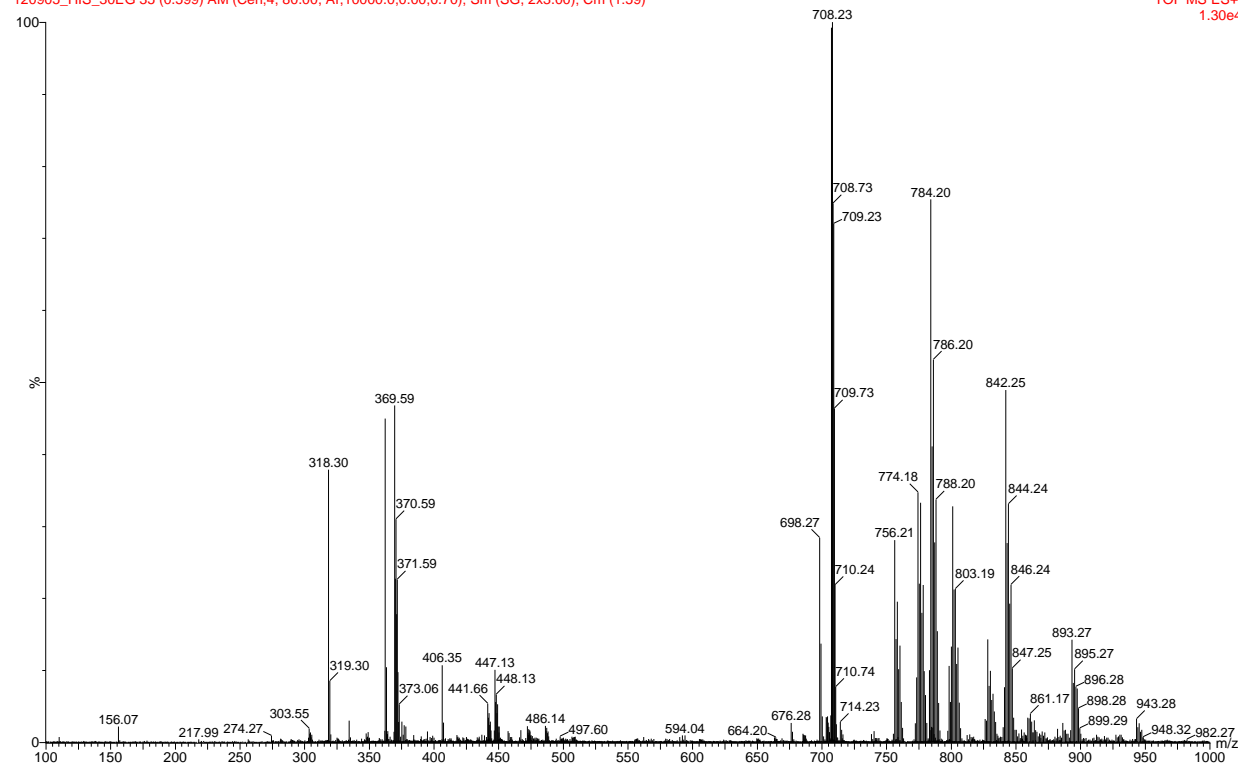

### 8+Zn<sup>2+</sup>+6.0eq His

10:42:11

120905\_HIS\_60EG 50 (0.855) AM (Cen,4, 80.00, Ar,10000.0,0.00,0.70); Sm (SG, 2x3.00); Cm (1:59)

05-Sep-2012

TOF MS ES+  
3.12e4

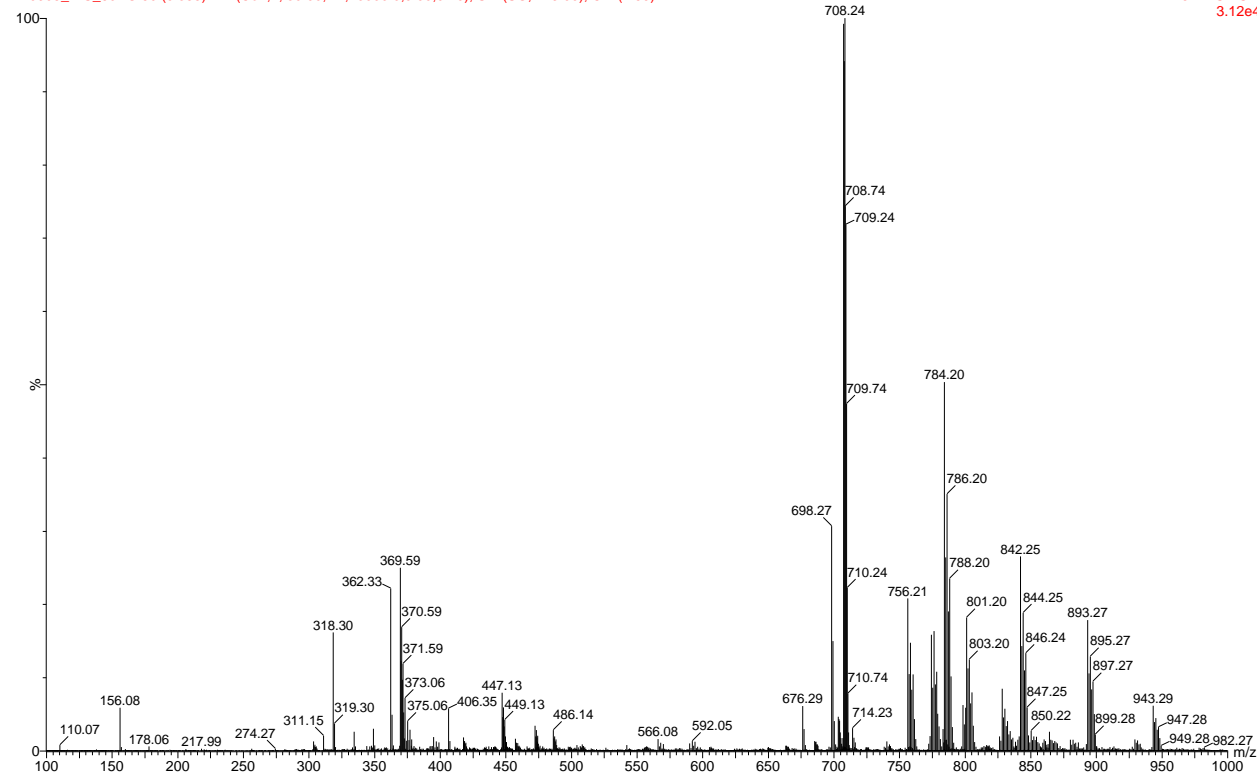

### 8+Zn<sup>2+</sup>+10.0 eq His

10:11:33

120905\_HIS\_100EG 49 (0.838) AM (Cen,4, 80.00, Ar,10000.0,0.00,0.70); Sm (SG, 2x3.00); Cm (1:58)

05-Sep-2012

TOF MS ES+  
2.95e4

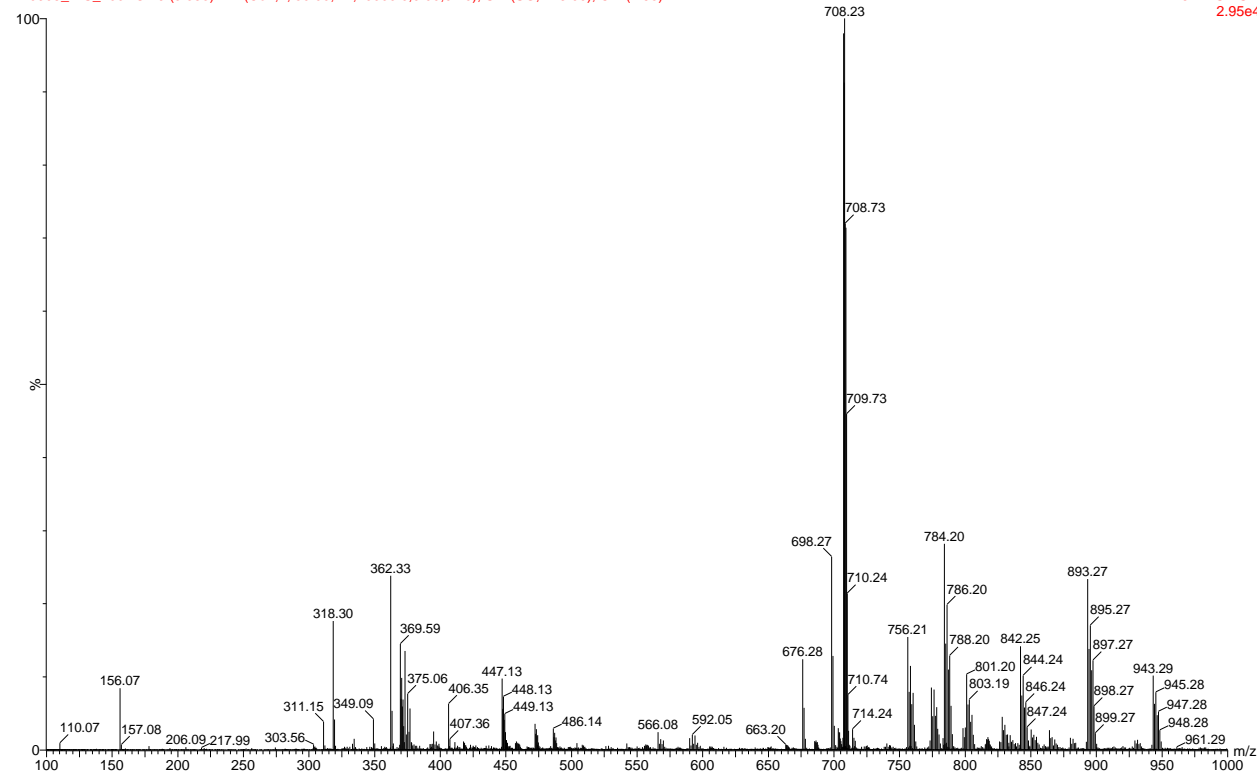

Supplement: c3cc42081g.pdf [file c3cc42081g.pdf]
